# Supplementary material for: Chloride -regulated Cu x O/RuCu heterostructure electrocatalyst towards high-performance Li–CO 2 batteries
Source: Royal Society of Chemistry journal article supplement (doi:10.1039/d5nr04361a), 2026-01-01
Supplement: d5nr04361a1.pdf [file d5nr04361a1.pdf]

## Support Information

### Chloride Regulated Cu<sub>x</sub>O/RuCu Heterostructure Electrocatalyst towards High-Performance Li-CO<sub>2</sub> Battery

*Liyun Ju,<sup>a</sup> Yanlong Wang,<sup>a</sup> Xijun Qu,<sup>a</sup> Jianwen Xu,<sup>a</sup> Hengyi Zhu,<sup>a</sup> Tao Jin,<sup>b</sup> Li Song,<sup>a</sup> Mingdao Zhang,<sup>a</sup> and Yachao Jin<sup>\*, a</sup>*

<sup>a</sup>Institute of Energy Supply Technology for High-end Equipment, Jiangsu Key Laboratory of Atmospheric Environment Monitoring and Pollution Control, Jiangsu Collaborative Innovation Center of Atmospheric Environment and Equipment Technology, School of Environmental Science and Engineering, Nanjing University of Information Science & Technology, Nanjing 210044 Jiangsu, P. R. China.

<sup>b</sup>Longmen Laboratory, Luoyang, Henan, 471000, China.

*Email: [jinyachao@nuist.edu.cn](mailto:jinyachao@nuist.edu.cn)*

## Experimental Section

Materials preparation: Firstly,  $\text{CuCl}_2 \cdot 2\text{H}_2\text{O}$  was dissolved in deionized water, and then PVP, NaOH and ascorbic acid were added to react in water bath at 40 °C. After the completion of the reaction, the  $\text{Cu}_2\text{O}$  catalyst was obtained by centrifugal cleaning and freeze-drying. In order to modify the  $\text{Cu}_2\text{O}$  catalyst, the  $\text{Cu}_2\text{O}$  catalyst was ultrasonically dissolved in ethanol and hydrothermally reacted at 120 °C for 10 h by adding  $\text{RuCl}_3 \cdot 3\text{H}_2\text{O}$ . The modified catalyst was obtained by centrifugal cleaning and freeze-drying. By adjusting the doping amount of  $\text{RuCl}_3 \cdot 3\text{H}_2\text{O}$  (0.1 mmol, 0.2 mmol, 0.3 mmol, 0.4 mmol), we named it  $\text{Cu}_x\text{O-Cl/RuCu-Y}$  ( $Y=1, 2, 3, 4$ ). Since  $\text{Cu}_x\text{O-Cl/RuCu-3}$  has the best performance,  $\text{Cu}_x\text{O-Cl / RuCu-3}$  is denoted as  $\text{Cu}_x\text{O-Cl/RuCu}$ .

Materials characterization: X-ray diffraction phase analysis (XRD) is a technique for material structure analysis by using the diffraction effect of X-ray in crystal materials. The catalyst was qualitatively analyzed by measuring the diffraction angle position (peak position), and the catalyst was quantitatively analyzed by measuring the peak intensity of the spectral line. Scanning electron microscope (SEM) is an observation method between transmission electron microscope and optical microscope which was used to observe the surface morphology of the catalyst. Transmission electron microscopy (TEM) and high-resolution transmission electron microscopy (HR-TEM) allow us to see the finer microstructure and morphology of the catalyst. In order to further analyze the surface composition and element valence of the catalyst, XPS technology was used to analyze the catalyst. Raman spectroscopy is an efficient, non-destructive analysis technology without complex sample preparation which was used for qualitative analysis and structural identification of the catalyst.

Electrochemical measurements: The electrochemical performance of the catalyst was evaluated by assembling the button cell. 10 mg catalyst and 10 mg KB were added to the mixed solution of 1.9 ml ethanol and 100 ul nafion (10%). The catalyst loading was controlled at about  $1 \text{ mg} \cdot \text{cm}^{-2}$ , and the cathode electrode was obtained by vacuum drying at 80 °C for 12 h. The anode is metal lithium sheet with a diameter of 15.6 mm. The separator is glass fiber with a diameter of 19 mm. The electrolyte is 1 M LiTFSI /

DMSO, and the drop amount is 200  $\mu$ L. The CR2032 battery shell with holes was used to assemble the battery in the glove box with  $\text{H}_2\text{O} < 0.01$  ppm and  $\text{O}_2 < 0.01$  ppm. The assembled battery was placed in a closed test bottle and replaced with  $\text{CO}_2$  gas for 20 min to wait for the test which includes constant current charge-discharge testing, rate performance testing, capacity testing and CV testing.

Theoretical calculation: Density functional theory (DFT) calculations were performed carried out with the CP2K package, employing the hybrid Gaussian and plane waves (GPW) method within its QUICKSTEP module. The core-valence electron separation was described by Goedecker–Teter–Hutter (GTH) pseudopotentials, while a molecularly optimized double-zeta valence plus polarization basis set (DZVP-MOLOPT-SR-GTH) was utilized for all atoms. An auxiliary plane wave basis with a cutoff energy of 500 Ry was applied to expand the electron density. Exchange and correlation effects were treated using the spin-polarized Perdew–Burke–Ernzerhof (PBE) functional under the generalized gradient approximation (GGA). The Kohn–Sham equations were solved via conventional matrix diagonalization, accelerated by the ELPA library, and electronic convergence was facilitated by Fermi–Dirac smearing with an electronic temperature of 300 K. To account for van der Waals interactions, the DFT-D3 dispersion correction scheme by Grimme et al. was incorporated. Structural relaxations were considered converged when energy and maximum force changes fell below  $1.0 \times 10^{-6}$  eV and  $3.0 \times 10^{-4}$  eV  $\text{\AA}^{-1}$ , respectively. For electronic structure calculations, a tighter energy threshold of  $1.0 \times 10^{-8}$  eV was adopted. Brillouin zone sampling was performed using Monkhorst–Pack k-point meshes:  $13 \times 13 \times 13$  grid for Cu and  $\text{Cu}_2\text{O}$  unit cell, and  $5 \times 3 \times 1$  grid for Cu/ $\text{Cu}_2\text{O}$  and RuCu/ $\text{Cu}_2\text{OCl}$  heterostructures. A vacuum layer of 20  $\text{\AA}$  was added along the non-periodic direction to isolate periodic images of the slabs. The optimized lattice parameters obtained for Cu and  $\text{Cu}_2\text{O}$  was 3.66 and 4.30  $\text{\AA}$ . Thermodynamics corrections and density of states (DOS) analyses were conducted using the Shermo and Multiwfn software packages, respectively. The charge density difference was visualized using the VESTA software.

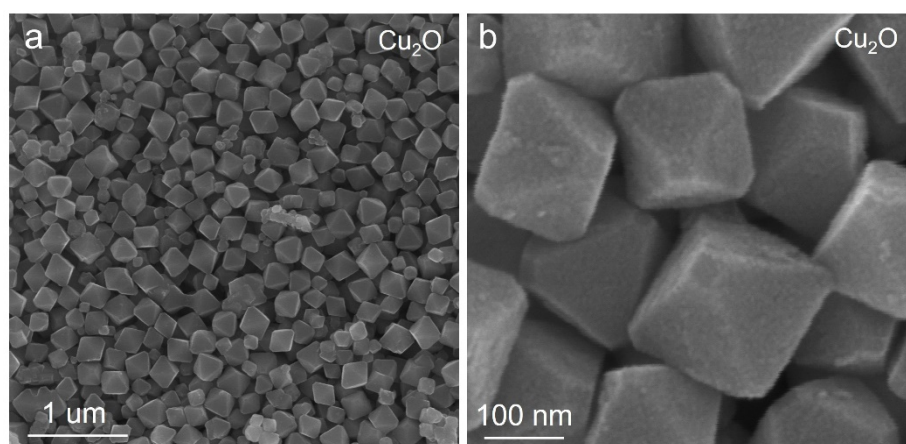

**Fig. S1.** SEM images of  $\text{Cu}_2\text{O}$

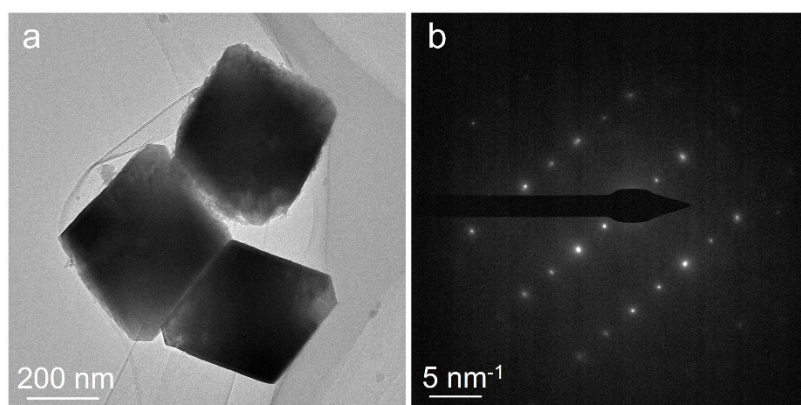

**Fig. S2.** (a) TEM image and (b) SAED image of Cu<sub>2</sub>O

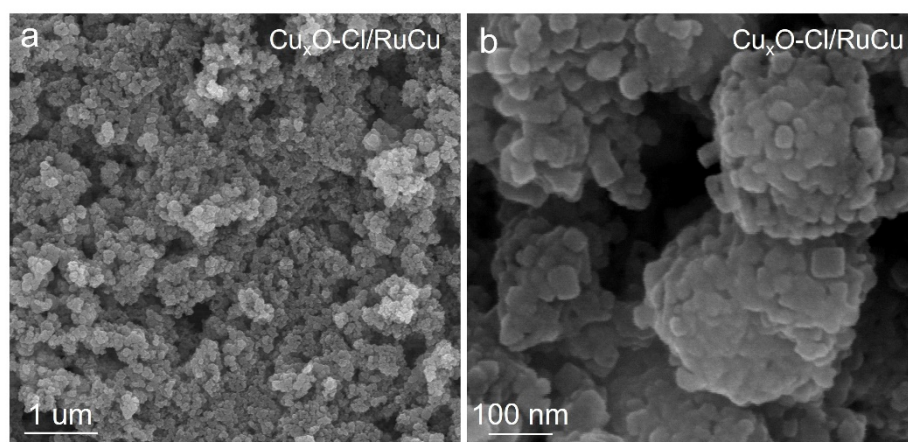

**Fig. S3.** SEM images of  $\text{Cu}_x\text{O-Cl/RuCu}$

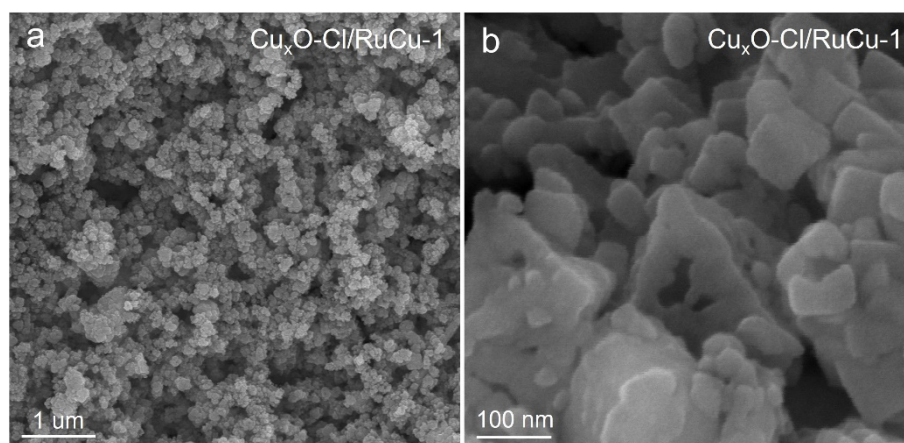

**Fig. S4.** SEM images of  $\text{Cu}_x\text{O-Cl/RuCu-1}$

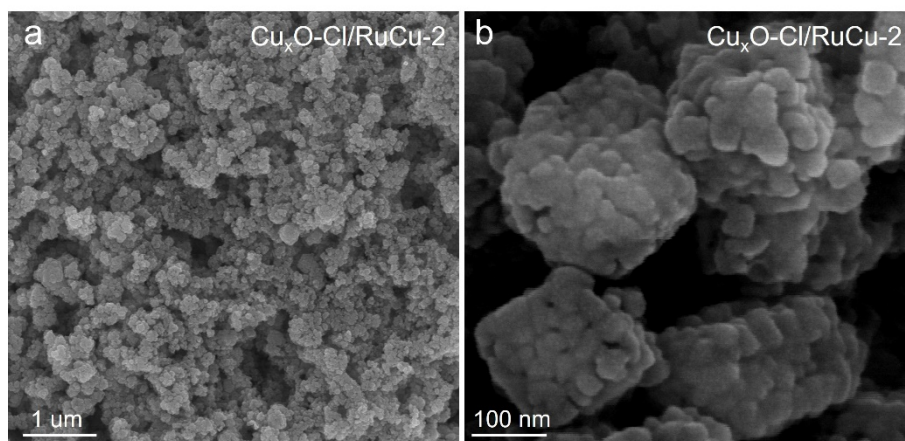

**Fig. S5.** SEM images of  $\text{Cu}_x\text{O-Cl/RuCu-2}$

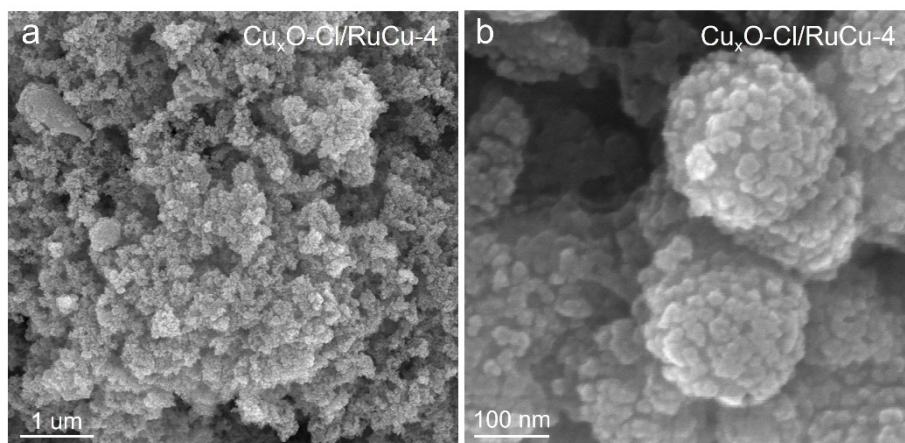

**Fig. S6.** SEM images of  $\text{Cu}_x\text{O-Cl/RuCu-4}$

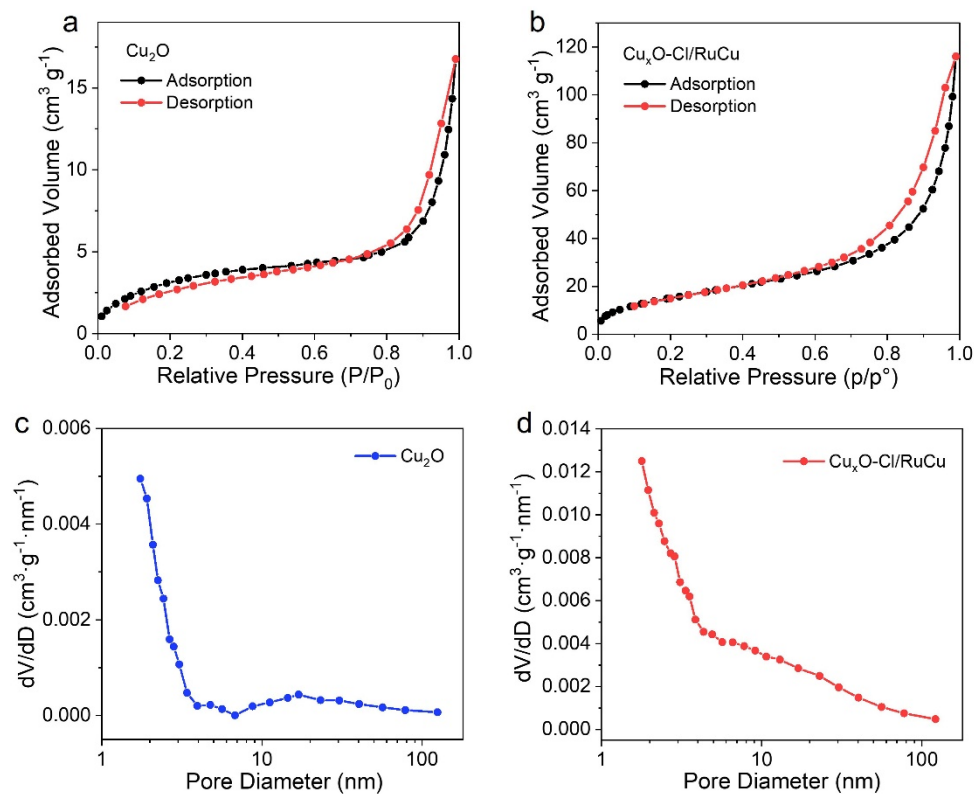

**Fig. S7.** Nitrogen adsorption-desorption isotherm of (a)  $\text{Cu}_2\text{O}$  and (b)  $\text{Cu}_x\text{O-Cl/RuCu}$  electrocatalysts. (c) The corresponding pore size distributions of (c)  $\text{Cu}_2\text{O}$  and (d)  $\text{Cu}_x\text{O-Cl/RuCu}$  electrocatalysts.

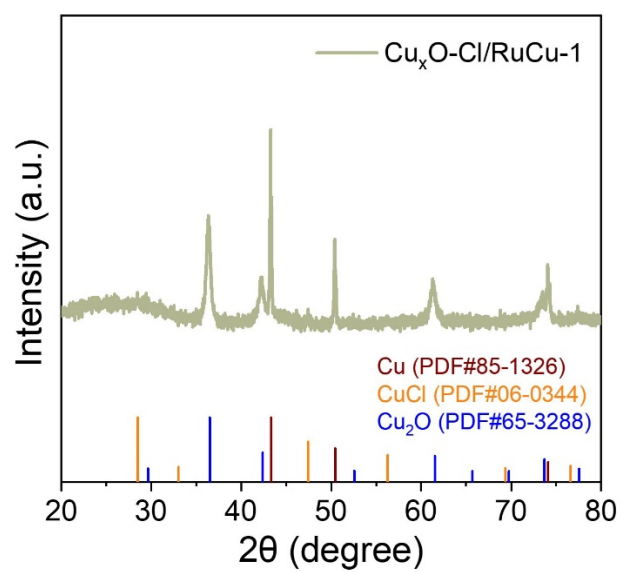

**Fig. S8.** XRD spectrum of  $\text{Cu}_x\text{O-Cl/RuCu-1}$  powder

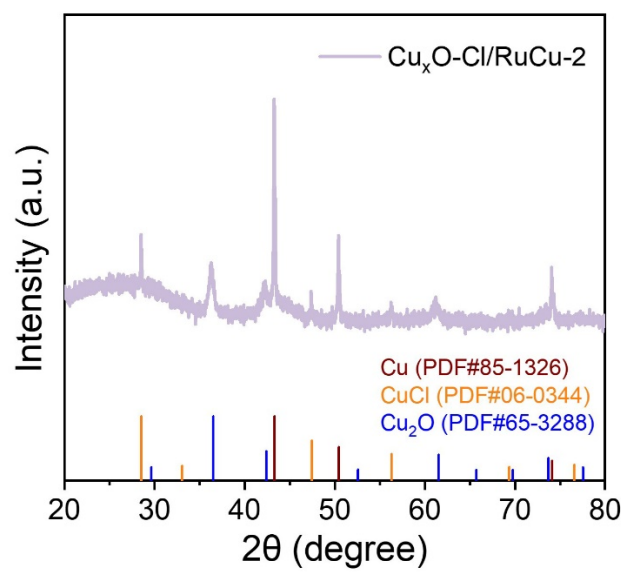

**Fig. S9.** XRD spectrum of  $\text{Cu}_x\text{O-Cl/RuCu-2}$  powder

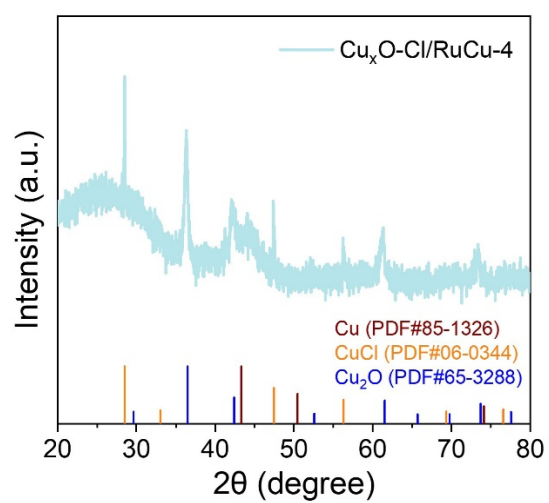

**Fig. S10.** XRD spectrum of  $\text{Cu}_x\text{O-Cl/RuCu-4}$  powder

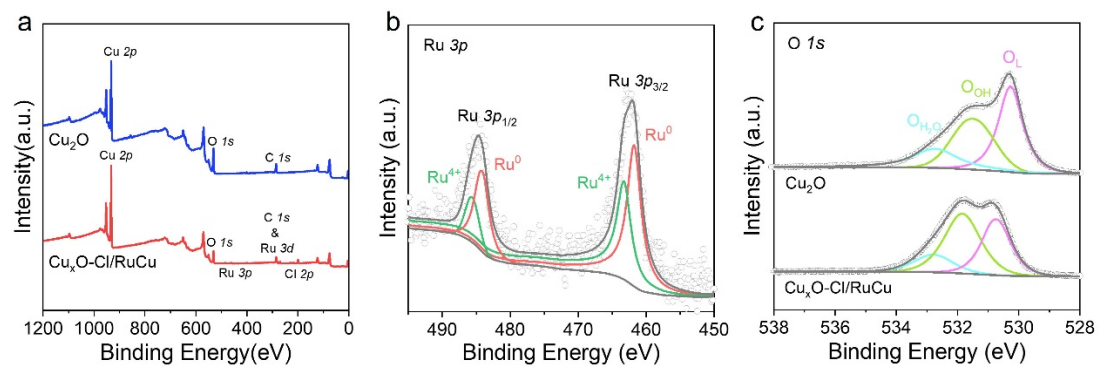

**Fig. S11.** (a) full XPS spectra for  $\text{Cu}_2\text{O}$  and  $\text{Cu}_x\text{O-Cl/RuCu}$ . High-resolution XPS spectra of (b) Ru 3p for  $\text{Cu}_x\text{O-Cl/RuCu}$ . (c) O 1s for  $\text{Cu}_2\text{O}$  and  $\text{Cu}_x\text{O-Cl/RuCu}$

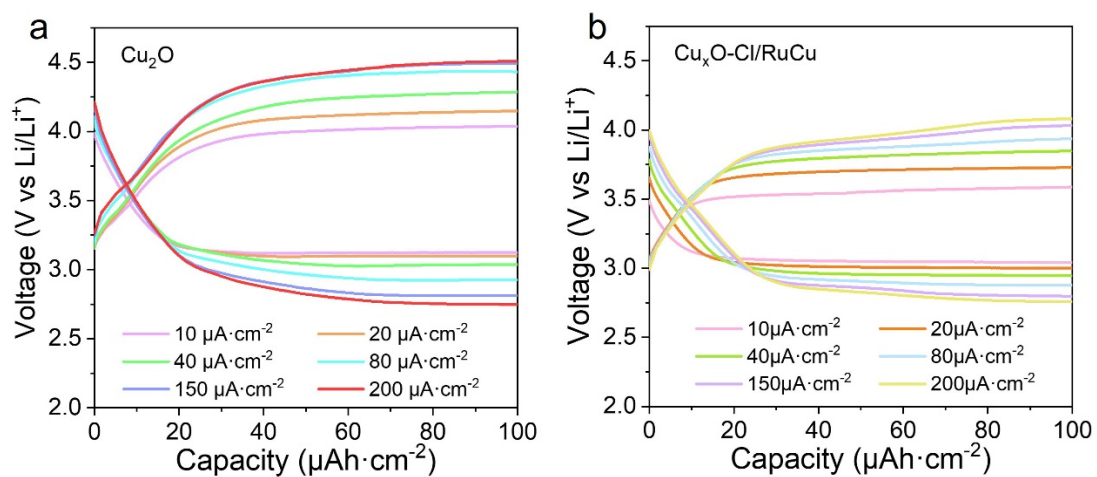

**Fig. S12.** Capacity-voltage curves of (a)  $\text{Cu}_2\text{O}$  and (b)  $\text{Cu}_x\text{O-Cl/RuCu}$  at different current densities

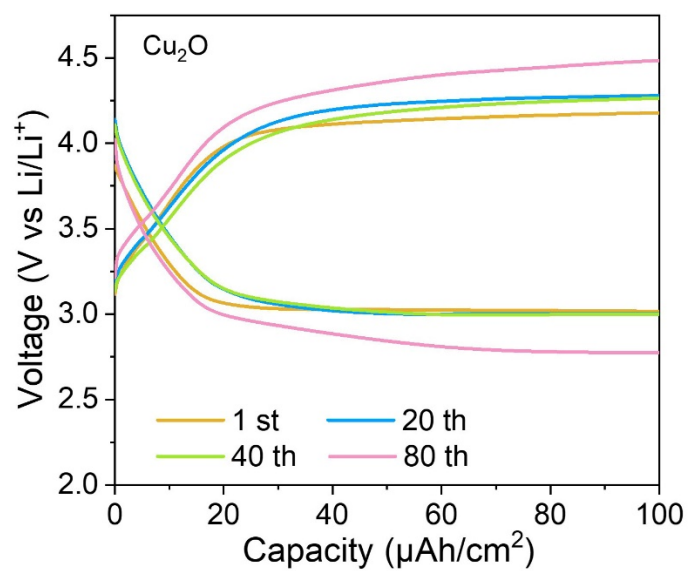

**Fig. S13.** Capacity-voltage curves of Cu<sub>2</sub>O at different cycles

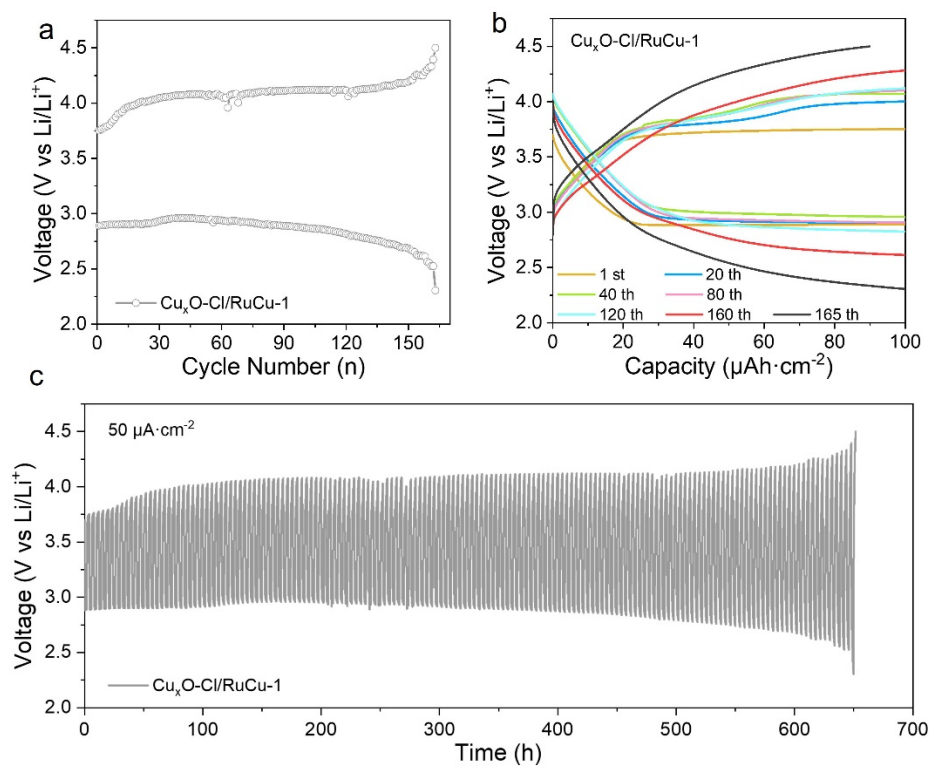

**Fig. S14.** Cycling performance diagram for  $\text{Cu}_x\text{O-Cl/RuCu-1}$  electrocatalyst. (a) Charge-discharge cut-off voltage curves. (b) Capacity-voltage curves. (c) Time-voltage curve

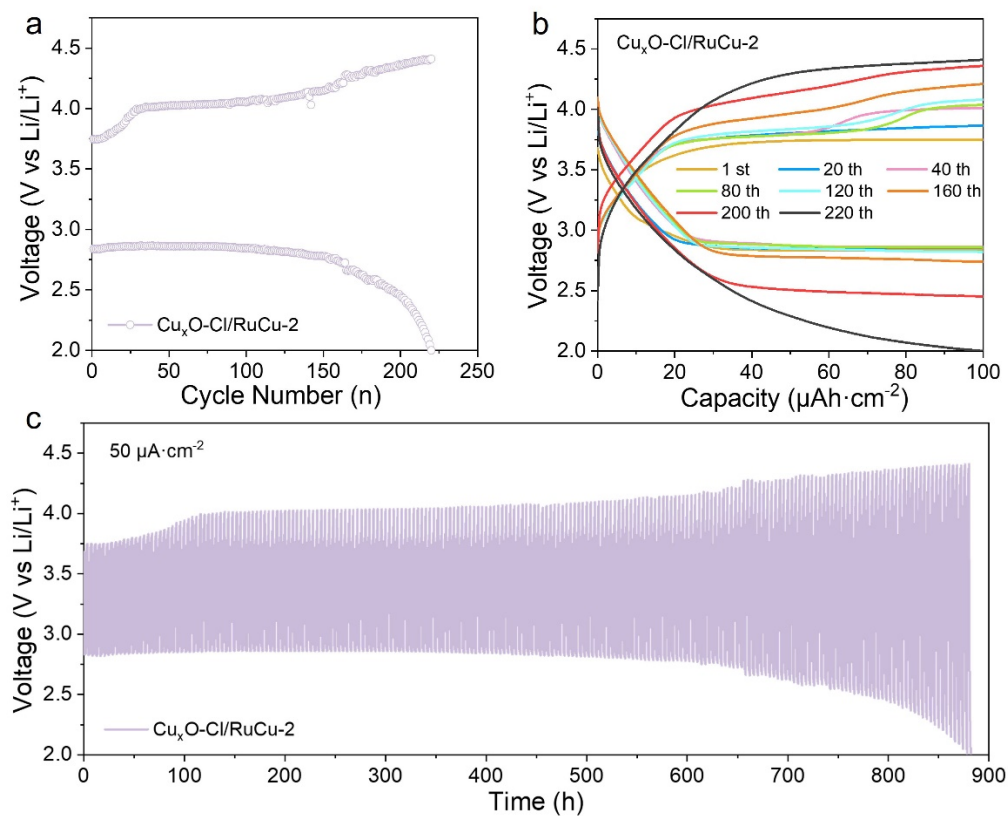

**Fig. S15.** Cycling performance diagram for  $\text{Cu}_x\text{O-Cl/RuCu-2}$  electrocatalyst. (a) Charge-discharge cut-off voltage curves. (b) Capacity-voltage curves. (c) Time-voltage curve

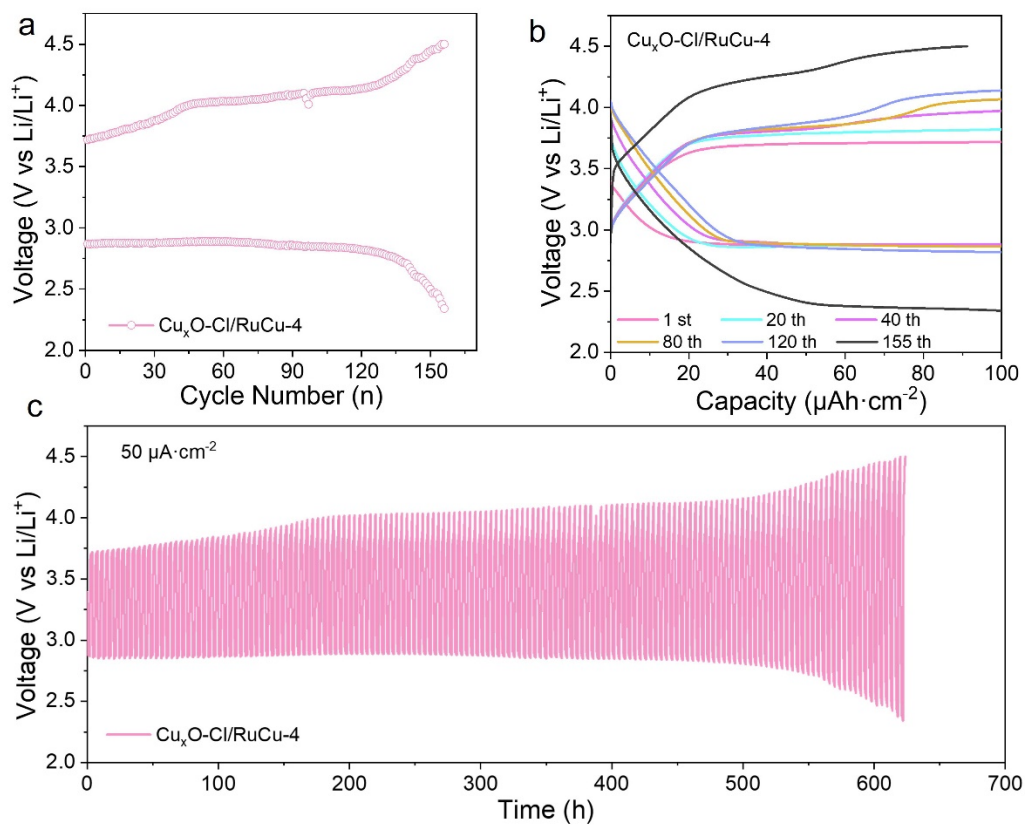

**Fig. S16.** Cycling performance diagram for  $\text{Cu}_x\text{O-Cl/RuCu-4}$  electrocatalyst. (a) Charge-discharge cut-off voltage curves. (b) Capacity-voltage curves. (c) Time-voltage curve

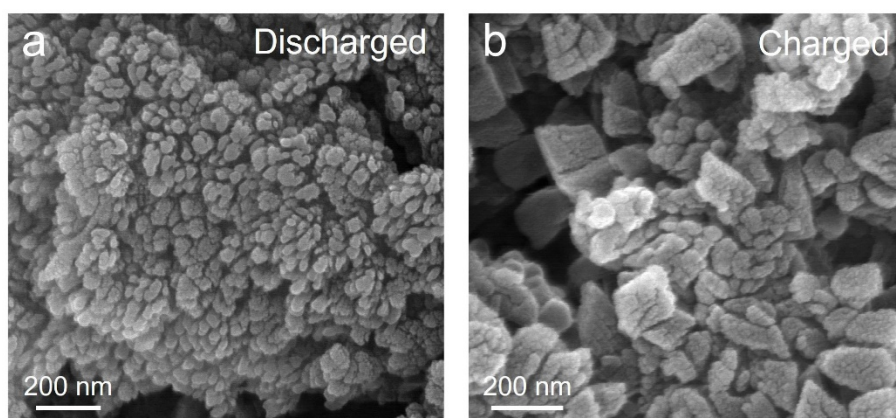

**Fig. S17.** SEM images of  $\text{Cu}_2\text{O}$  cathode after charge and discharge

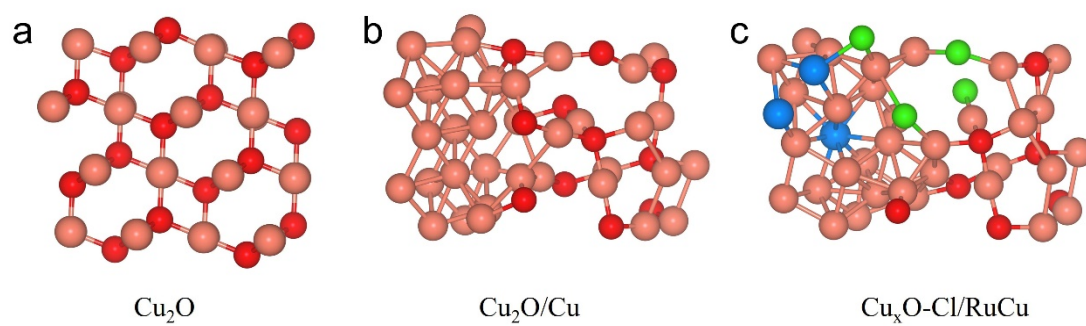

**Fig. S18.** The optimized structure for (a)  $\text{Cu}_2\text{O}$ , (b)  $\text{Cu}_2\text{O}/\text{Cu}$  and (c)  $\text{Cu}_x\text{O-Cl}/\text{RuCu}$

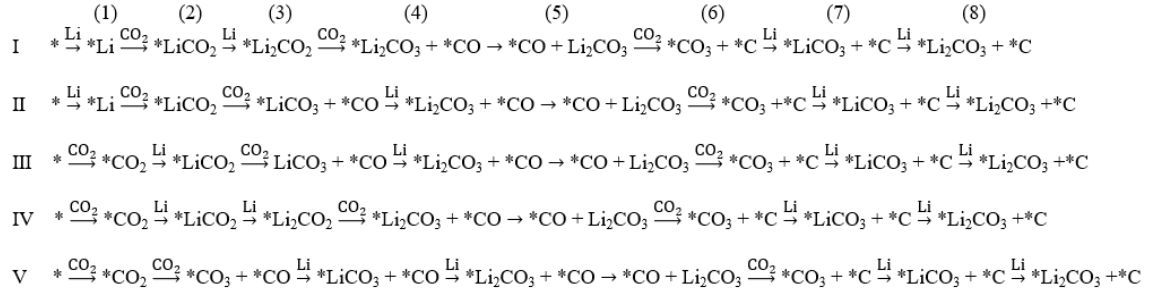

**Fig. S19.** Possible reaction pathways for the formation of  $\text{Li}_2\text{CO}_3$  and C in the Li- $\text{CO}_2$  battery system of this work

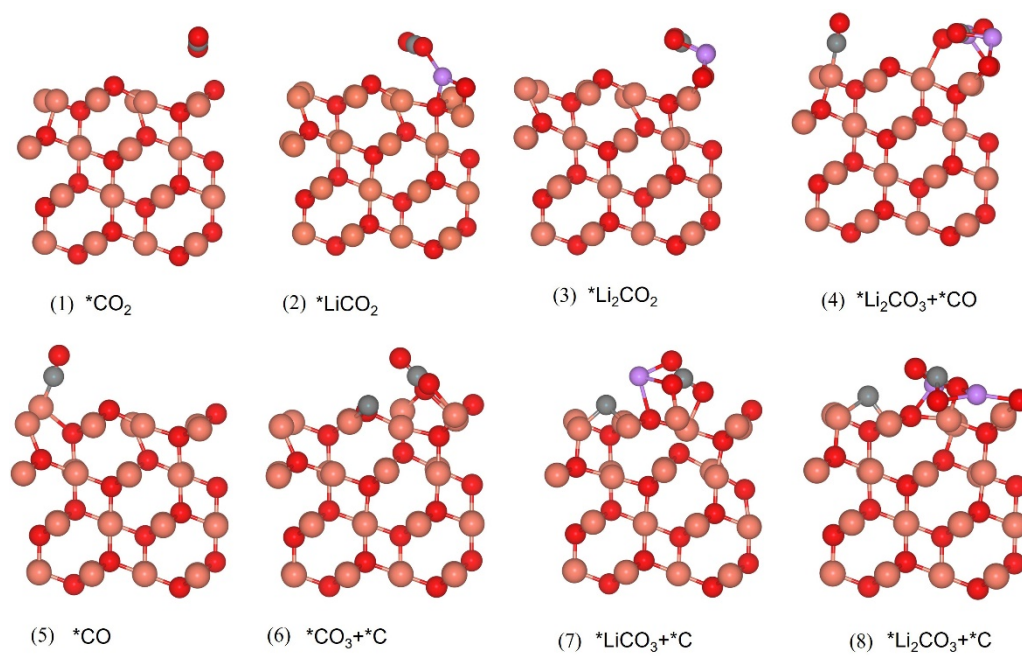

**Fig. S20.** The side views of adsorption configuration on  $\text{Cu}_2\text{O}$

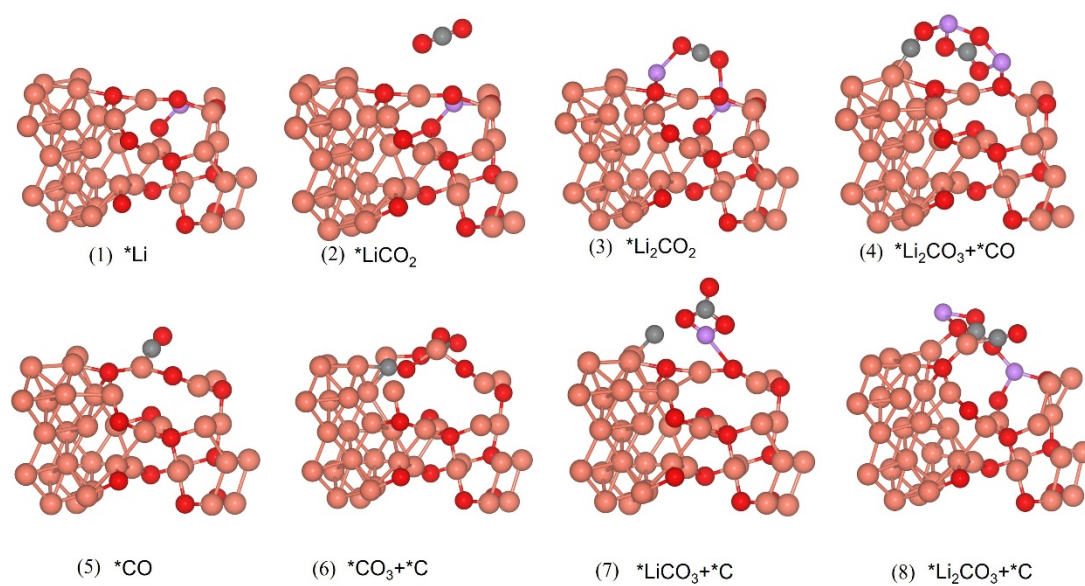

**Fig. S21.** The side views of adsorption configuration on  $\text{Cu}_2\text{O}/\text{Cu}$

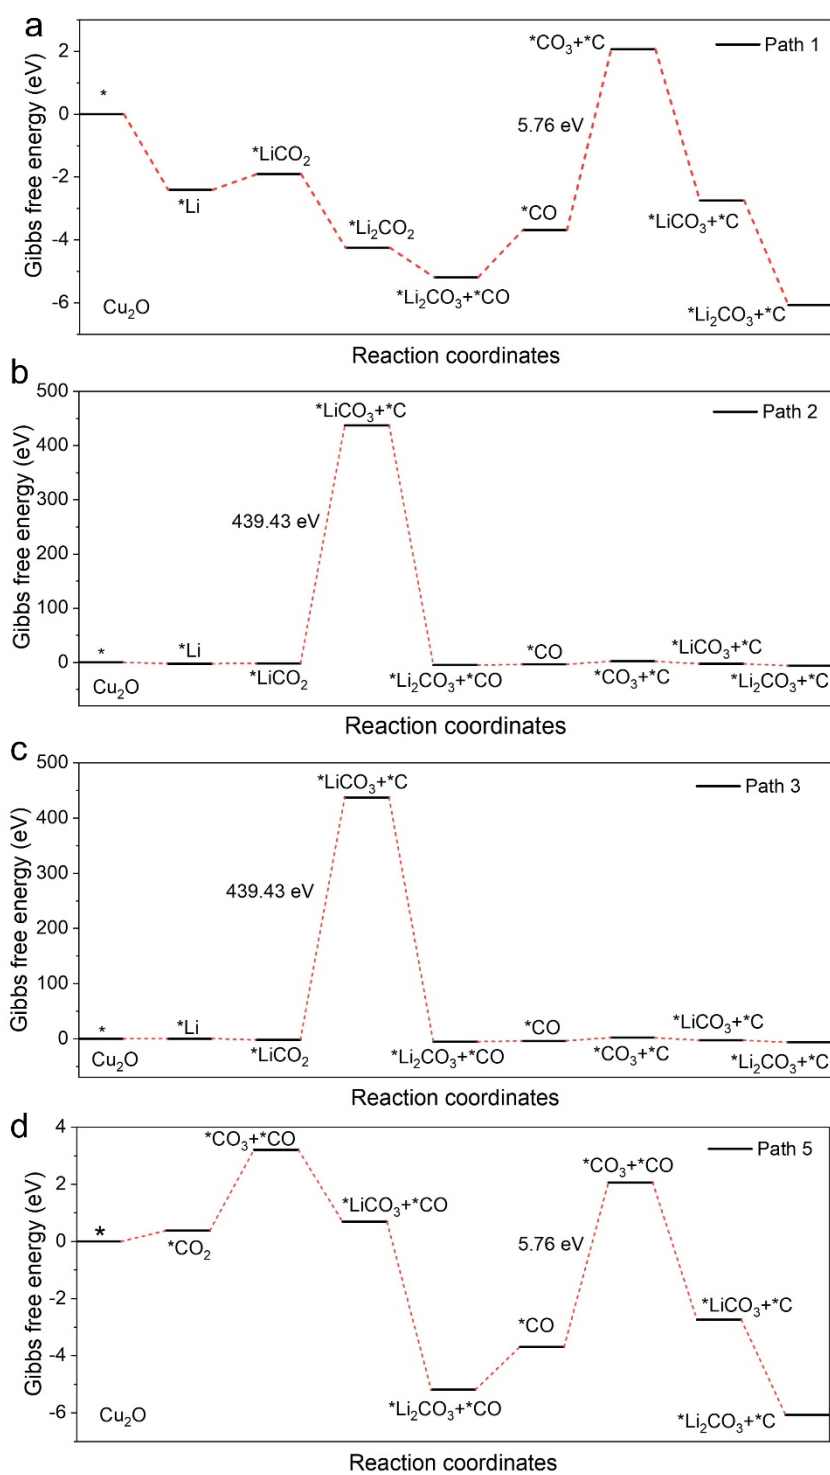

**Fig. S22.** The Calculated Gibbs free energy profiles for the nucleation of  $\text{Li}_2\text{CO}_3$  and C on the surface of  $\text{Cu}_2\text{O}$

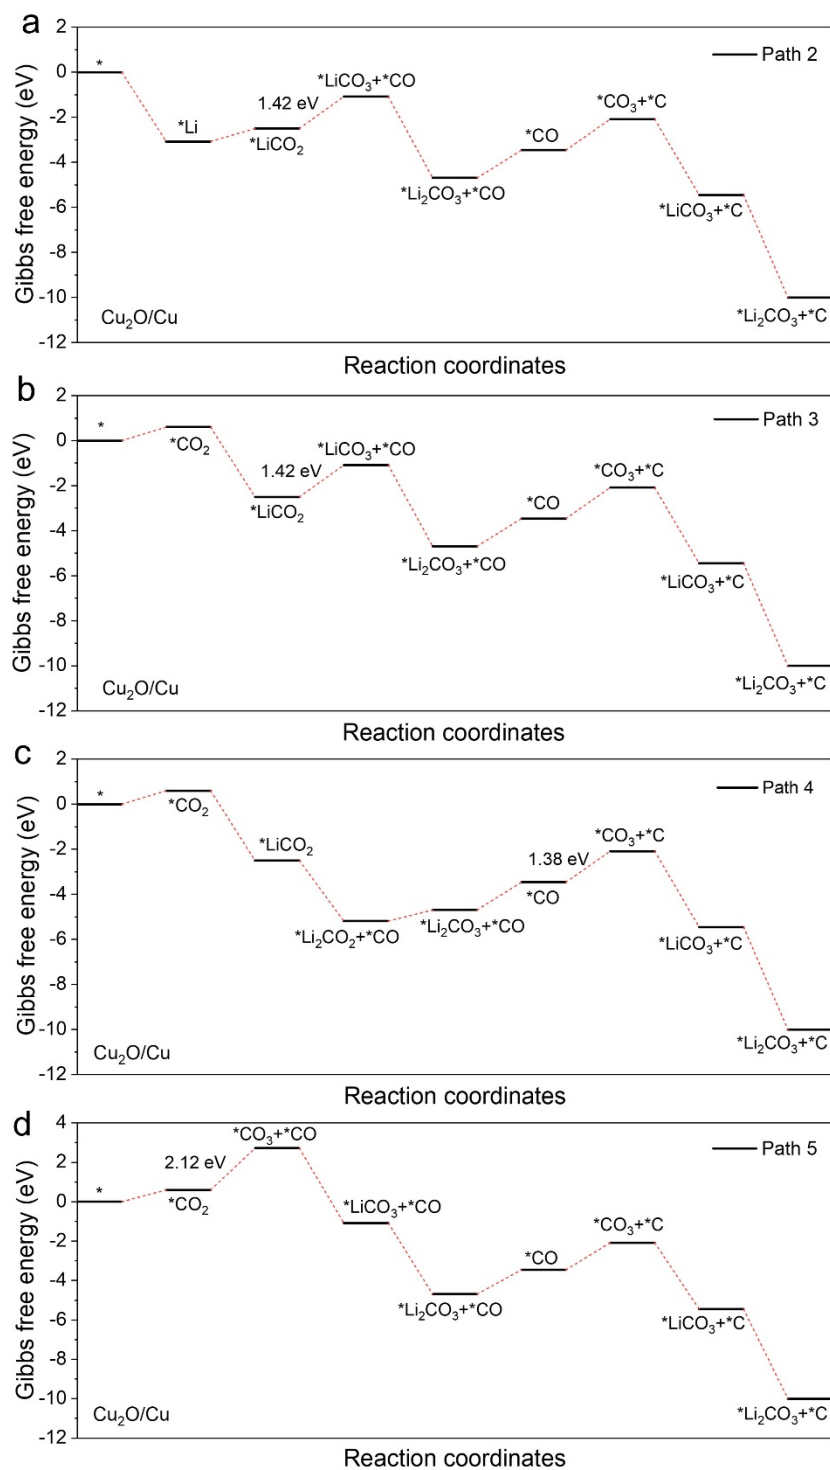

**Fig. S23.** The Calculated Gibbs free energy profiles for the nucleation of  $\text{Li}_2\text{CO}_3$  and C on the surface of  $\text{Cu}_2\text{O}/\text{Cu}$

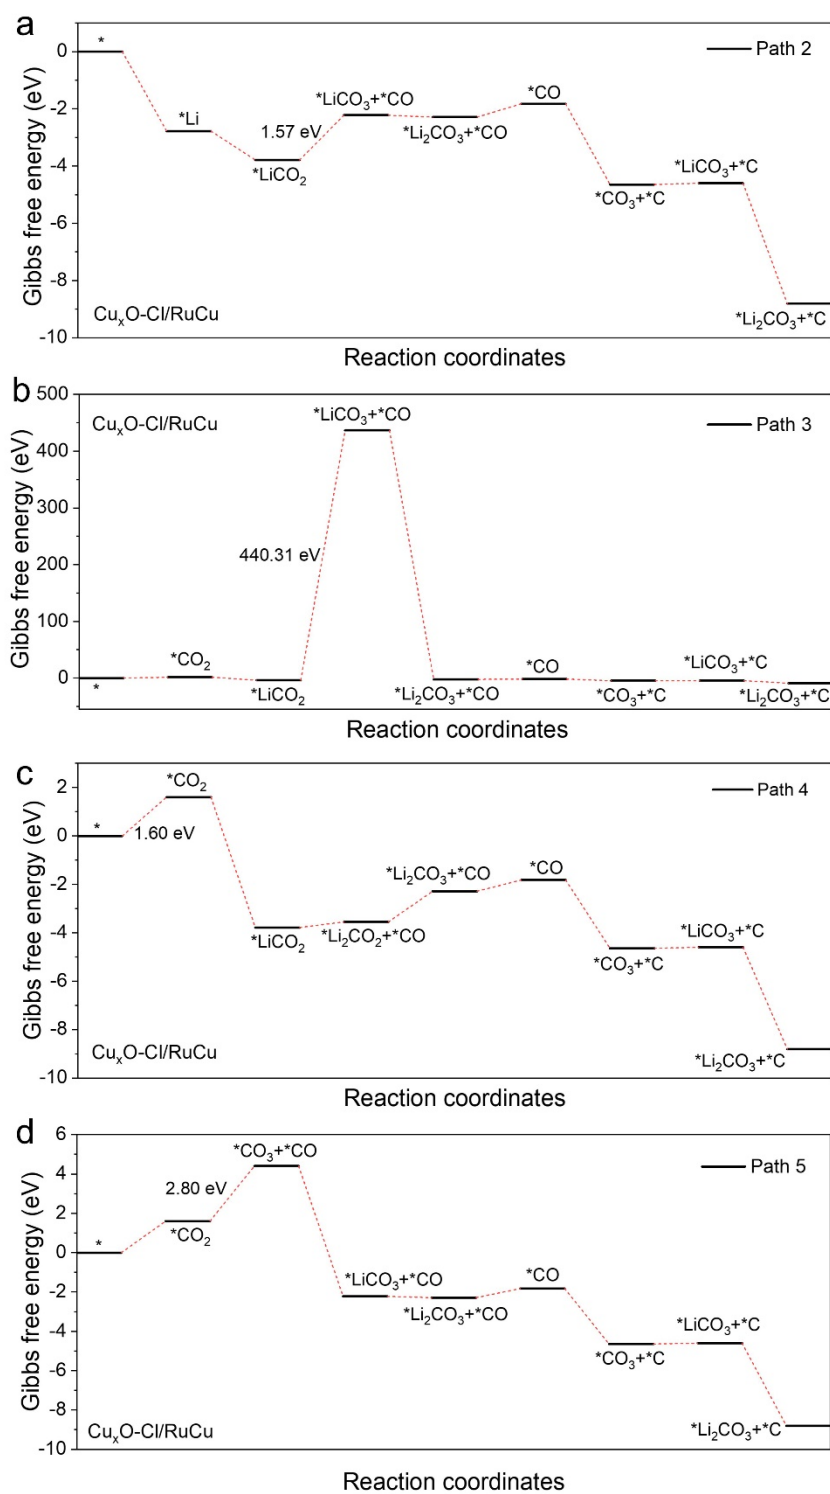

**Fig. S24.** The Calculated Gibbs free energy profiles for the nucleation of  $\text{Li}_2\text{CO}_3$  and C on the surface of  $\text{Cu}_x\text{O-Cl/RuCu}$

**Table S1.** The BET surface area and pore size for Cu<sub>2</sub>O and Cu<sub>x</sub>O-Cl/RuCu electrocatalysts

| Electrocatalyst           | BET Surface Area (m <sup>2</sup> ·g <sup>-1</sup> ) | Total Pore Volume (cm <sup>3</sup> ·g <sup>-1</sup> ) | Avg. Pore Diameter (nm) |
|---------------------------|-----------------------------------------------------|-------------------------------------------------------|-------------------------|
| Cu <sub>2</sub> O         | 11.63                                               | 0.0253                                                | 8.7167                  |
| Cu <sub>x</sub> O-Cl/RuCu | 53.34                                               | 0.1774                                                | 13.3045                 |

**Table S2.** The element ratio of Cu<sub>x</sub>O-Cl/RuCu

| Element | Atomic ratio (%) | Mass ratio (%) |
|---------|------------------|----------------|
| O       | 25.85            | 7.50           |
| Cu      | 57.41            | 66.14          |
| Ru      | 13.12            | 24.04          |
| Cl      | 3.62             | 2.33           |

**Table S3.** The comparison of Li-CO<sub>2</sub> battery electrocatalysts<sup>S1-12</sup>

| Electrocatalyst                                         | Overpotential | Charge Voltage | Cycling performance                                  | Discharge capacity                                                                  | Ref.      |
|---------------------------------------------------------|---------------|----------------|------------------------------------------------------|-------------------------------------------------------------------------------------|-----------|
| Cu <sub>x</sub> O-Cl/RuCu                               | 0.54 V        | 3.59 V         | 180 cycles<br>at 50 $\mu\text{A}\cdot\text{cm}^{-2}$ | 8041.73 $\mu\text{Ah}\cdot\text{cm}^{-2}$<br>at 50 $\mu\text{A}\cdot\text{cm}^{-2}$ | This work |
| CoS-Vs-1.0                                              | 0.62 V        | 3.61 V         | 600 h<br>at 20 $\mu\text{A}\cdot\text{cm}^{-2}$      | 4637.6 $\mu\text{Ah}\cdot\text{cm}^{-2}$<br>at 50 $\mu\text{A}\cdot\text{cm}^{-2}$  | S1        |
| Cu-Co <sub>3</sub> O <sub>4</sub>                       | 0.73 V        | 3.8 V          | 800 h<br>at 20 $\mu\text{A}\cdot\text{cm}^{-2}$      | 6950 $\mu\text{Ah}\cdot\text{cm}^{-2}$<br>at 50 $\mu\text{A}\cdot\text{cm}^{-2}$    | S2        |
| CoSe <sub>2</sub> /CMF                                  | 0.72 V        | 3.86 V         | 162 cycles<br>at 20 $\mu\text{A}\cdot\text{cm}^{-2}$ | 5620 $\mu\text{Ah}\cdot\text{cm}^{-2}$<br>at 50 $\mu\text{A}\cdot\text{cm}^{-2}$    | S3        |
| V-MoS <sub>2</sub> /Co <sub>9</sub> S <sub>8</sub> @CP  | 0.68 V        | 3.67 V         | 630 h<br>at 20 $\mu\text{A}\cdot\text{cm}^{-2}$      | 3954 $\mu\text{Ah}\cdot\text{cm}^{-2}$<br>at 40 $\mu\text{A}\cdot\text{cm}^{-2}$    | S4        |
| P-Mn <sub>2</sub> O <sub>3</sub> /KB                    | 1.8 V         | 4.3 V          | 50 cycles<br>at 50 $\text{mA}\cdot\text{g}^{-1}$     | 9434 $\text{mAh}\cdot\text{g}^{-1}$<br>at 50 $\text{mA}\cdot\text{g}^{-1}$          | S5        |
| N,S-doped CNTs                                          | 1.67 V        | 4.3 V          | 538 cycles<br>at 200 $\text{mA}\cdot\text{g}^{-1}$   | 23560 $\text{mAh}\cdot\text{g}^{-1}$<br>at 200 $\text{mA}\cdot\text{g}^{-1}$        | S6        |
| Adjacent Co/GO                                          | 1.64 V        | 4.15 V         | 100 cycles<br>at 100 $\text{mA}\cdot\text{g}^{-1}$   | 17358 $\text{mAh}\cdot\text{g}^{-1}$<br>at 100 $\text{mA}\cdot\text{g}^{-1}$        | S7        |
| Ru/ACNF                                                 | 1.35 V        | 4.15 V         | 50 cycles<br>at 100 $\text{mA}\cdot\text{g}^{-1}$    | 11495 $\text{mAh}\cdot\text{g}^{-1}$<br>at 200 $\text{mA}\cdot\text{g}^{-1}$        | S8        |
| Ru/NS-G                                                 | 1.13 V        | 4.04 V         | 100 cycles<br>at 100 $\text{mA}\cdot\text{g}^{-1}$   | 12448 $\text{mAh}\cdot\text{g}^{-1}$<br>at 100 $\text{mA}\cdot\text{g}^{-1}$        | S9        |
| B-NCNT                                                  | 1.04 V        | 4.05 V         | 360 cycles<br>at 1000 $\text{mA}\cdot\text{g}^{-1}$  | 23 328 $\text{mAh}\cdot\text{g}^{-1}$<br>at 50 $\text{mA}\cdot\text{g}^{-1}$        | S10       |
| Co <sub>0.1</sub> Ni <sub>0.9</sub> O <sub>x</sub> /CNT | 1.27 V        | 3.94 V         | 50 cycles<br>at 100 $\text{mA}\cdot\text{g}^{-1}$    | 5871 $\text{mAh}\cdot\text{g}^{-1}$<br>at 100 $\text{mA}\cdot\text{g}^{-1}$         | S11       |
| Fe-ISA/N, S-HGs                                         | 1.17 V        | 3.95 V         | 200 cycles<br>at 1000 $\text{mA}\cdot\text{g}^{-1}$  | 23174 $\text{mAh}\cdot\text{g}^{-1}$<br>at 100 $\text{mA}\cdot\text{g}^{-1}$        | S12       |

## References

- S1 B. Lu, X. Wu, M. Zhang, X. Xiao, B. Chen, Y. Liu, R. Mao, Y. Song, X.-X. Zeng, J. Yang and G. Zhou, *J. Am. Chem. Soc.*, 2024, **146**, 20814-20822.
- S2 J. Qiu, M. Wang, Y. Liu, Y. Song, Z. Yang, Y. Chen, B. Lu, X. Tao, J. Yang and G. Zhou, *Angew. Chem. Int. Ed.*, 2025, **n/a**, e202516978.
- S3 K. Wang, L. Liu, D. Liu, Y. Wei, Y. Liu, X. Wang, A. S. Vasenko, M. Li, S. Ding, C. Xiao and H. Pan, *Small*, 2024, **20**, 2310530.
- S4 B. Lu, B. Chen, D. Wang, C. Li, R. Gao, Y. Liu, R. Mao, J. Yang and G. Zhou, *Proc. Natl. Acad. Sci.*, 2023, **120**, e2216933120.
- S5 W. Ma, S. Lu, X. Lei, X. Liu and Y. Ding, *J. Mater. Chem. A.*, 2018, **6**, 20829-20835.
- S6 L. Song, C. Hu, Y. Xiao, J. He, Y. Lin, J. W. Connell and L. Dai, *Nano Energ.*, 2020, **71**, 104595.
- S7 B.-W. Zhang, Y. Jiao, D.-L. Chao, C. Ye, Y.-X. Wang, K. Davey, H.-K. Liu, S.-X. Dou and S.-Z. Qiao, *Adv. Funct. Mater.*, 2019, **29**, 1904206.
- S8 Y. Qiao, S. Xu, Y. Liu, J. Dai, H. Xie, Y. Yao, X. Mu, C. Chen, D. J. Kline, E. M. Hitz, B. Liu, J. Song, P. He, M. R. Zachariah and L. Hu, *Energy Environ. Sci.*, 2019, **12**, 1100-1107.
- S9 Y. Qiao, J. Wu, J. Zhao, Q. Li, P. Zhang, C. Hao, X. Liu, S. Yang and Y. Liu, *Energy Storage Mater.*, 2020, **27**, 133-139.
- S10 X. Li, J. Zhou, J. Zhang, M. Li, X. Bi, T. Liu, T. He, J. Cheng, F. Zhang, Y. Li, X. Mu, J. Lu and B. Wang, *Adv. Mater.*, 2019, **31**, 1903852.
- S11 X. Xiao, Z. Zhang, W. Yu, W. Shang, Y. Ma, X. Zhu and P. Tan, *ACS Appl. Energy Mater.*, 2021, **4**, 11858-11866.
- S12 C. Hu, L. Gong, Y. Xiao, Y. Yuan, N. M. Bedford, Z. Xia, L. Ma, T. Wu, Y. Lin, J. W. Connell, R. Shahbazian-Yassar, J. Lu, K. Amine and L. Dai, *Adv. Mater.*, 2020, **32**, 1907436.
